# Supplementary material for: Extracts of Common Pesticidal Plants Increase Plant Growth and Yield in Common Bean Plants
Source: PubMed Central journal article supplement (PMC7076451; doi:10.3390/plants9020149), 2020-01-23
Supplement: plants-09-00149-s001.pdf [file plants-09-00149-s001.pdf]

**Supplementary Table S1.** Effects of foliar fertilizer, synthetic pesticide and botanical plant extracts on common bean growth. The values presented are means  $\pm$  SE. \*, \*\*, \*\*\* = significant at  $P \leq 0.05$ ,  $P \leq 0.01$ ,  $P \leq 0.001$ , respectively, ns=not significant. Means followed by the same letter in a column are not significantly different.

| Treatments                        | Plant height (cm)   | Number of leaves     | Number of branches | Leaf area             | Stem width (mm)  | Leaf greenness   |
|-----------------------------------|---------------------|----------------------|--------------------|-----------------------|------------------|------------------|
| <b>Treatment applied</b>          |                     |                      |                    |                       |                  |                  |
| Foliar fertilizer                 | 36.7 $\pm$ 1.17 a,b | 3.1 $\pm$ 0.13 a,b   | 2.9 $\pm$ 0.21 b,c | 21.4 $\pm$ 0.38 a,b   | 3.7 $\pm$ 0.08 a | 3.2 $\pm$ 0.21 b |
| Synthetic Pesticide               | 33.2 $\pm$ 1.20 c   | 2.7 $\pm$ 0.17 c     | 2.6 $\pm$ 0.22 b,c | 20.4 $\pm$ 0.49 b     | 3.3 $\pm$ 0.09 b | 3.3 $\pm$ 0.27 b |
| <i>Tephrosia vogelii</i>          | 39.6 $\pm$ 1.38 a   | 3.2 $\pm$ 0.17 a     | 3.6 $\pm$ 0.18 a   | 22.6 $\pm$ 0.58 a     | 3.7 $\pm$ 0.10 a | 4.8 $\pm$ 0.13 a |
| <i>Tithonia diversifolia</i>      | 36.4 $\pm$ 0.89 b   | 3.2 $\pm$ 0.14 a     | 3.0 $\pm$ 0.11 b   | 21.6 $\pm$ 0.72 a,b   | 3.7 $\pm$ 0.10 a | 4.5 $\pm$ 0.16 a |
| Water                             | 34.1 $\pm$ 0.88 b,c | 3.0 $\pm$ 0.00 a,b,c | 2.5 $\pm$ 0.13 c   | 21.5 $\pm$ 6.0.37 a,b | 3.3 $\pm$ 0.07 b | 3.0 $\pm$ 0.19 b |
| Water and Soap                    | 36.2 $\pm$ 1.20 b,c | 2.8 $\pm$ 0.09 b,c   | 2.6 $\pm$ 0.12 b,c | 21.3 $\pm$ 0.71 a,b   | 3.4 $\pm$ 0.08 b | 3.3 $\pm$ 0.25 b |
| <b>Method of application</b>      |                     |                      |                    |                       |                  |                  |
| Foliar spray                      | 35.8 $\pm$ 0.81 a   | 3.0 $\pm$ 0.07 a     | 3.0 $\pm$ 0.12 a   | 21.9 $\pm$ 0.36 a     | 3.5 $\pm$ 0.06 a | 3.7 $\pm$ 0.17 a |
| Soil drench                       | 36.3 $\pm$ 0.58 a   | 3.0 $\pm$ 0.09 a     | 2.8 $\pm$ 0.09 a   | 21.0 $\pm$ 0.28 b     | 3.5 $\pm$ 0.05 a | 3.7 $\pm$ 0.14 a |
| <b>2 way ANOVA (F statistics)</b> |                     |                      |                    |                       |                  |                  |
| Treatment                         | 4.26 **             | 2.38 *               | 5.56 ***           | 1.86 **               | 5.70 ***         | 12.36 ***        |
| Method of application             | 0.36 ns             | 0.60 ns              | 2.26 ns            | 4.16 *                | 1.16 ns          | 0.30 ns          |
| Treatment*Method of application   | 2.71 *              | 0.60 ns              | 0.31 ns            | 3.52 **               | 1.00 ns          | 0.89 ns          |

**Supplementary Table S2.** Effects of foliar fertilizer, synthetic pesticide and botanical plant extracts on common bean growth. Correlation matrix (Pearson (n)): CC = Chlorophyll content; FL = Flavonoids; AN = Anthocyanins; PH = Plant height; NL = Number of leaves; NB = Number of branches; LA = Leaf area; SW = Stem width; LG = Leaf greenness; NPP = Number of pods per plant; and SY=seed yield/plant; Phen= Phenylalanine; Trypt=Tryptophan and Ru=Rutin.

| Variables | CC           | FL           | AC       | PH           | NL           | NB           | LA           | STW          | LG           | NPP          | SY       | Phen.        | Trypt.       | Ru.      |
|-----------|--------------|--------------|----------|--------------|--------------|--------------|--------------|--------------|--------------|--------------|----------|--------------|--------------|----------|
| CC        | <b>1</b>     |              |          |              |              |              |              |              |              |              |          |              |              |          |
| FL        | <b>0.715</b> | <b>1</b>     |          |              |              |              |              |              |              |              |          |              |              |          |
| AC        | 0.013        | -0.038       | <b>1</b> |              |              |              |              |              |              |              |          |              |              |          |
| PH        | <b>0.772</b> | 0.452        | 0.188    | <b>1</b>     |              |              |              |              |              |              |          |              |              |          |
| NL        | <b>0.690</b> | <b>0.682</b> | 0.489    | <b>0.707</b> | <b>1</b>     |              |              |              |              |              |          |              |              |          |
| NB        | <b>0.936</b> | 0.575        | -0.014   | <b>0.654</b> | <b>0.608</b> | <b>1</b>     |              |              |              |              |          |              |              |          |
| LA        | <b>0.597</b> | 0.133        | 0.186    | <b>0.683</b> | 0.374        | 0.560        | <b>1</b>     |              |              |              |          |              |              |          |
| STW       | <b>0.718</b> | <b>0.691</b> | -0.050   | <b>0.668</b> | <b>0.738</b> | <b>0.620</b> | 0.251        | <b>1</b>     |              |              |          |              |              |          |
| LG        | <b>0.754</b> | 0.483        | -0.039   | <b>0.652</b> | <b>0.604</b> | <b>0.815</b> | <b>0.583</b> | <b>0.661</b> | <b>1</b>     |              |          |              |              |          |
| NPP       | <b>0.942</b> | <b>0.678</b> | -0.012   | <b>0.716</b> | <b>0.687</b> | <b>0.887</b> | <b>0.689</b> | <b>0.671</b> | <b>0.781</b> | <b>1</b>     |          |              |              |          |
| SY        | <b>0.956</b> | <b>0.738</b> | 0.070    | <b>0.781</b> | <b>0.784</b> | <b>0.884</b> | <b>0.653</b> | <b>0.762</b> | <b>0.814</b> | <b>0.938</b> | <b>1</b> |              |              |          |
| Phen.     | 0.559        | 0.461        | -0.257   | 0.131        | 0.022        | <b>0.583</b> | 0.323        | 0.151        | 0.402        | 0.515        | 0.471    | <b>1</b>     |              |          |
| Trypt.    | 0.574        | 0.379        | -0.141   | 0.167        | 0.066        | <b>0.631</b> | 0.375        | 0.132        | 0.425        | 0.527        | 0.478    | <b>0.980</b> | <b>1</b>     |          |
| Ru.       | 0.548        | 0.353        | -0.302   | 0.158        | 0.088        | <b>0.608</b> | 0.201        | 0.250        | 0.272        | 0.471        | 0.451    | <b>0.815</b> | <b>0.846</b> | <b>1</b> |

Values in bold are different from 0 with a significance level alpha=0.05.

**Supplementary table S3.** Eigenvalues.

|                 | F1     | F2     | F3     | F4     | F5     | F6     | F7     | F8     | F9     | F10    | F11     |
|-----------------|--------|--------|--------|--------|--------|--------|--------|--------|--------|--------|---------|
| Eigenvalue      | 8.032  | 2.560  | 1.199  | 0.915  | 0.382  | 0.362  | 0.222  | 0.163  | 0.095  | 0.047  | 0.024   |
| Variability (%) | 57.374 | 18.286 | 8.566  | 6.535  | 2.727  | 2.587  | 1.585  | 1.161  | 0.677  | 0.332  | 0.171   |
| Cumulative %    | 57.374 | 75.660 | 84.226 | 90.761 | 93.487 | 96.074 | 97.659 | 98.820 | 99.497 | 99.829 | 100.000 |

**Supplementary material S4.** Factor loadings and correlations between variables and factors CC = Chlorophyll content; FL = Flavonoids; AN = Anthocyanins; PH = Plant height; NL = Number of leaves; NB = Number of branches; LA = Leaf area; SW = Stem width; LG = Leaf greenness; NPP = Number of pods per plant; SY=seed yield/plant; Phen= Phenylalanine; Trypt=Tryptophan and Ru=Rutin.

|    | F1    | F2     | F3     | F4     | F5     | F6    | F7     | F8    | F9    | F10    | F11    |
|----|-------|--------|--------|--------|--------|-------|--------|-------|-------|--------|--------|
| CC | 0.975 | -0.007 | -0.019 | -0.005 | -0.089 | 0.011 | -0.102 | 0.114 | 0.116 | -0.029 | -0.056 |

|        |       |        |        |        |        |        |        |        |        |        |        |
|--------|-------|--------|--------|--------|--------|--------|--------|--------|--------|--------|--------|
| FL     | 0.732 | -0.045 | -0.494 | 0.301  | 0.068  | 0.340  | 0.013  | 0.041  | -0.047 | -0.025 | 0.052  |
| AC     | 0.024 | -0.562 | 0.493  | 0.650  | 0.036  | -0.096 | 0.049  | -0.005 | 0.069  | -0.006 | -0.002 |
| PH     | 0.768 | -0.418 | 0.151  | -0.201 | -0.281 | 0.035  | 0.197  | 0.220  | -0.056 | 0.040  | -0.002 |
| NL     | 0.726 | -0.581 | -0.100 | 0.307  | 0.006  | -0.058 | -0.042 | -0.064 | -0.141 | 0.041  | 0.000  |
| NB     | 0.932 | 0.097  | 0.051  | -0.037 | 0.053  | -0.223 | -0.188 | 0.128  | 0.050  | -0.038 | 0.092  |
| LA     | 0.640 | -0.113 | 0.643  | -0.291 | -0.056 | 0.208  | 0.024  | -0.169 | -0.011 | -0.038 | 0.052  |
| STW    | 0.744 | -0.325 | -0.457 | -0.088 | -0.084 | -0.151 | 0.204  | -0.173 | 0.148  | 0.005  | 0.021  |
| LG     | 0.831 | -0.113 | 0.037  | -0.266 | 0.411  | -0.190 | 0.107  | 0.016  | -0.089 | 0.007  | -0.017 |
| NPP    | 0.951 | -0.039 | 0.040  | -0.090 | 0.020  | 0.114  | -0.202 | -0.076 | 0.048  | 0.145  | -0.025 |
| SY     | 0.974 | -0.137 | -0.018 | -0.019 | 0.001  | 0.054  | -0.061 | -0.054 | -0.028 | -0.127 | -0.073 |
| Phen.  | 0.597 | 0.749  | 0.084  | 0.165  | 0.102  | 0.124  | 0.141  | 0.021  | 0.037  | 0.001  | -0.006 |
| Trypt. | 0.614 | 0.718  | 0.206  | 0.209  | 0.072  | -0.012 | 0.118  | 0.019  | 0.024  | 0.040  | -0.008 |
| Ru.    | 0.565 | 0.701  | -0.041 | 0.151  | -0.301 | -0.221 | -0.031 | -0.102 | -0.117 | -0.006 | 0.001  |

**Supplementary material S5.** Squared cosines of the variables: CC = Chlorophyll content; FL = Flavonoids; AN = Anthocyanins; PH = Plant height; NL = Number of leaves; NB = Number of branches; LA = Leaf area; SW = Stem width; LG = Leaf greenness; NPP = Number of pods per plant; and SY=seed yield/plant; Phen= Phenylalanine; Trypt=Tryptophan and Ru=Rutin.

|       | <b>F1</b>    | <b>F2</b>    | <b>F3</b>    | <b>F4</b>    | <b>F5</b> | <b>F6</b> | <b>F7</b> | <b>F8</b> | <b>F9</b> | <b>F10</b> | <b>F11</b> |
|-------|--------------|--------------|--------------|--------------|-----------|-----------|-----------|-----------|-----------|------------|------------|
| CC    | <b>0.951</b> | 0.000        | 0.000        | 0.000        | 0.008     | 0.000     | 0.010     | 0.013     | 0.014     | 0.001      | 0.003      |
| FL    | <b>0.535</b> | 0.002        | 0.244        | 0.091        | 0.005     | 0.116     | 0.000     | 0.002     | 0.002     | 0.001      | 0.003      |
| AC    | 0.001        | 0.316        | 0.243        | <b>0.423</b> | 0.001     | 0.009     | 0.002     | 0.000     | 0.005     | 0.000      | 0.000      |
| PH    | <b>0.589</b> | 0.175        | 0.023        | 0.040        | 0.079     | 0.001     | 0.039     | 0.048     | 0.003     | 0.002      | 0.000      |
| NL    | <b>0.527</b> | 0.338        | 0.010        | 0.094        | 0.000     | 0.003     | 0.002     | 0.004     | 0.020     | 0.002      | 0.000      |
| NB    | <b>0.869</b> | 0.010        | 0.003        | 0.001        | 0.003     | 0.050     | 0.035     | 0.016     | 0.003     | 0.001      | 0.009      |
| LA    | 0.410        | 0.013        | <b>0.414</b> | 0.084        | 0.003     | 0.043     | 0.001     | 0.029     | 0.000     | 0.001      | 0.003      |
| STW   | <b>0.554</b> | 0.106        | 0.209        | 0.008        | 0.007     | 0.023     | 0.042     | 0.030     | 0.022     | 0.000      | 0.000      |
| LG    | <b>0.690</b> | 0.013        | 0.001        | 0.071        | 0.169     | 0.036     | 0.012     | 0.000     | 0.008     | 0.000      | 0.000      |
| NPP   | <b>0.905</b> | 0.002        | 0.002        | 0.008        | 0.000     | 0.013     | 0.041     | 0.006     | 0.002     | 0.021      | 0.001      |
| SY    | <b>0.949</b> | 0.019        | 0.000        | 0.000        | 0.000     | 0.003     | 0.004     | 0.003     | 0.001     | 0.016      | 0.005      |
| Phen. | 0.357        | <b>0.561</b> | 0.007        | 0.027        | 0.010     | 0.015     | 0.020     | 0.000     | 0.001     | 0.000      | 0.000      |

|        |       |              |       |       |       |       |       |       |       |       |       |
|--------|-------|--------------|-------|-------|-------|-------|-------|-------|-------|-------|-------|
| Trypt. | 0.377 | <b>0.515</b> | 0.042 | 0.044 | 0.005 | 0.000 | 0.014 | 0.000 | 0.001 | 0.002 | 0.000 |
| Ru.    | 0.319 | <b>0.492</b> | 0.002 | 0.023 | 0.091 | 0.049 | 0.001 | 0.010 | 0.014 | 0.000 | 0.000 |

Values in bold correspond for each variable to the factor for which the squared cosine is the largest.

**Supplementary material S6.** Squared cosines of the observations: FS= Foliar Spray, SD=Soil Drench.

|                      | <b>F1</b>    | <b>F2</b>    | <b>F3</b>    | <b>F4</b> | <b>F5</b> | <b>F6</b> | <b>F7</b> | <b>F8</b> | <b>F9</b> | <b>F10</b> | <b>F11</b> |
|----------------------|--------------|--------------|--------------|-----------|-----------|-----------|-----------|-----------|-----------|------------|------------|
| Foliar fertilizer_FS | <b>0.697</b> | 0.008        | 0.009        | 0.105     | 0.088     | 0.092     | 0.000     | 0.000     | 0.001     | 0.000      | 0.000      |
| Foliar fertilizer_SD | <b>0.352</b> | 0.184        | 0.239        | 0.101     | 0.019     | 0.009     | 0.037     | 0.035     | 0.021     | 0.000      | 0.002      |
| Synthetic_FS         | 0.123        | <b>0.843</b> | 0.001        | 0.017     | 0.006     | 0.004     | 0.000     | 0.000     | 0.004     | 0.001      | 0.000      |
| Synthetic_SD         | <b>0.598</b> | 0.014        | 0.135        | 0.162     | 0.000     | 0.033     | 0.001     | 0.008     | 0.026     | 0.023      | 0.001      |
| T.diversifolia_FS    | <b>0.692</b> | 0.003        | 0.032        | 0.077     | 0.099     | 0.061     | 0.012     | 0.023     | 0.000     | 0.001      | 0.000      |
| T.diversifolia_SD    | 0.118        | 0.114        | <b>0.409</b> | 0.263     | 0.034     | 0.038     | 0.014     | 0.001     | 0.007     | 0.001      | 0.000      |
| T.vogelii_FS         | <b>0.891</b> | 0.029        | 0.014        | 0.021     | 0.010     | 0.031     | 0.001     | 0.001     | 0.002     | 0.000      | 0.000      |
| T.vogelii_SD         | <b>0.674</b> | 0.174        | 0.009        | 0.000     | 0.039     | 0.001     | 0.021     | 0.070     | 0.011     | 0.001      | 0.000      |
| Water_FS             | <b>0.669</b> | 0.003        | 0.134        | 0.080     | 0.007     | 0.004     | 0.085     | 0.006     | 0.012     | 0.001      | 0.000      |
| Water_SD             | <b>0.596</b> | 0.212        | 0.115        | 0.020     | 0.002     | 0.003     | 0.031     | 0.003     | 0.009     | 0.002      | 0.005      |
| Water and soap_FS    | <b>0.702</b> | 0.076        | 0.057        | 0.099     | 0.007     | 0.001     | 0.002     | 0.022     | 0.000     | 0.031      | 0.003      |
| Water and soap_SD    | <b>0.443</b> | 0.166        | 0.266        | 0.004     | 0.036     | 0.015     | 0.032     | 0.009     | 0.008     | 0.001      | 0.018      |

Values in bold correspond for each observation to the factor for which the squared cosine is the largest.
